# Supplementary material for: Implementation and Evaluation of Obstetric Early Warning Systems in tertiary care hospitals in Nigeria
Source: Research Square preprint supplement (doi:10.21203/rs.3.rs-124414/v1), 2020-12-14
Supplement: Supplementary file 1 [file 546d7fe08dd9a44f21a6b4a4.docx]

**Table A: Sample size calculation**

|  |  | **Baseline of 25%** | **Baseline of 30%** |
| --- | --- | --- | --- |
| **Number in pre-intervention** | **Number in the follow-up period** | **Reduction detectable** | **Reduction detectable** |

|  |  | **80% power** | | **90% power** | **80% power** | **90% power** |
| --- | --- | --- | --- | --- | --- | --- |
| 380 (2 months) | 570 (3 months) | 8.0% | | 9.1% | 8.6% | 9.8% |
|  | 760 (4 months) | 7.6% | | 8.7% | 8.1% | 9.3% |
|  | 950 (5 months) | 7.3% | | 8.4% | 7.8% | 9.0% |
|  | 1140 (6 months) | 7.1% | | 8.2% | 7.6% | 8.8% |
| 570 (3 months) | 570 (3 months) | 7.2% | | 8.2% | 7.7% | 8.8% |
| **Sample size by study arms** | | | | | | |
| Study arm | Before | |  | After |  | Total |
| Intervention | 600 |  | | 600 |  | 1200 |
| Control 1 | 300 |  | | 300 |  | 600 |
| Control 2 | 300 |  | | 300 |  | 600 |
| Total | 1200 |  | | 1200 |  | 2400 |

Intervention = UITH Ilorin, Control 1 = National hospital Abuja, Control 2 = ATBUTH Bauchi
